# DENIES: A deep learning based two-layer predictor for enhancing the identification of enhancers and their strength with DNA shape information

Ye Li<sup>1</sup>, Chunquan Li<sup>2</sup>, Jiquan Ma<sup>1\*</sup>

<sup>1</sup> Department of Computer Science and Technology, Heilongjiang University, Harbin, China

<sup>2</sup> School of Medical informatics, Daqing Campus, Harbin Medical University, Daqing, China

\* Corresponding author

Email address: [majiquan@hlju.edu.cn](mailto:majiquan@hlju.edu.cn)

## Abstract

The identification of enhancers has always been an important task in bioinformatics owing to their major role in regulating gene expression. For this reason, many computational algorithms devoted to enhancer identification have been put forward over the years, ranging from statistics and machine learning to the increasing popular deep learning. To boost the performance of their methods, more features tend to be extracted from the single DNA sequences and integrated to develop an ensemble classifier. Nevertheless, the sequence-derived features used in previous studies can hardly provide the 3D structure information of DNA sequences, which is regarded as an important factor affecting the binding preferences of transcription factors to regulatory elements like enhancers. Given that, we here propose DENIES, a deep learning based two-layer predictor for enhancing the identification of enhancers and their strength. Besides two common sequence-derived features (i.e. one-hot and  $k$ -mer), it introduces DNA shape for describing the 3D structures of DNA sequences. The results of performance comparison with a series of state-of-the-art methods conducted on the same datasets prove the effectiveness and robustness of our method. The code implementation of our predictor is freely available at <https://github.com/hlju-liye/DENIES>.

**Keywords:** Gene expression, Enhancer identification, 3D structure, Deep learning, Two-layer predictor, Strength, DNA shape

## 35 **1. Introduction**

36 The living and development of organisms are inseparable from the proper function of gene  
37 expression in cells, which is regulated by the concerted cooperation of various types of gene  
38 regulatory elements located in the non-coding regions of genome [1]. The typical regulatory  
39 elements include enhancers, promoters, silencers and insulators. Among these, enhancers are  
40 deemed as the most crucial ones responsible for regulating the transcription of their target  
41 genes. Different from gene proximal regulatory elements like promoters, the location of  
42 enhancers relative to their target genes can't be simply formulated. They can be located  
43 upstream or downstream and sometimes within introns of their target genes. Beyond that,  
44 some enhancers can bypass their nearest genes to regulate more distant ones along a  
45 chromosome. In some special cases, they can even regulate genes on another chromosome [2].  
46 This kind of locational uncertainty has made their prediction a very challenging task for  
47 modern biologists.

48 The very early attempts to identify enhancers on a genome-wide scale started with  
49 biologically experimental methods. The most representative one is chromatin  
50 immunoprecipitation followed by deep sequencing (ChIP-seq) [3]. By targeting at enhancer  
51 associated marks like transcription activator p300, histone H3 monomethylated at K4  
52 (H3K4me1) and H3 acetylated at lysine 27 (H3K27ac) [4-6], this technique has been  
53 successfully applied in some cell lines to identify enhancers. Another category of  
54 experimental method is based on chromatin accessibility, i.e., detecting the open regions on  
55 the genome. Two commonly used techniques are DNase I digestion coupled to sequencing  
56 (DNase-seq) [7] and transposase-accessible chromatin followed by sequencing (ATAC-seq)  
57 [8]. In addition, further studies on enhancers have shown that they can function as  
58 transcriptional units and produce non-coding RNAs (eRNAs), which are hallmarks of active  
59 enhancers [9]. But eRNAs are generally unstable and have a short half-life, which make them  
60 extremely hard to detect in cells. Despite of this, several techniques have been developed to  
61 detect the expression of eRNAs, like global run-on sequencing (GRO-seq) and cap-analysis  
62 of gene expression (CAGE) [10-11]. While all of the aforementioned experimental methods  
63 are useful to some extent, there is currently no golden standard in biology for enhancer  
64 identification. And beyond that, experimental ways are time-consuming and labor-intensive.  
65 It's basically impractical at present to identify enhancers for all the cell types at various  
66 stages.

67 On this account, some computational methods have been put forward to fill this gap. As  
68 the first attempt, Heintzman et al. developed a computational prediction algorithm to locate  
69 enhancers in the ENCODE regions of HeLa cells based on similarity to the training set  
70 chromatin profiles [5]. Firpi et al. further proposed a computational framework named  
71 CSI-ANN [12]. It was composed of a data transformation and a feature extraction step  
72 followed by a classification step with time-delay neural network. With the discovery and map

73 of more and more histone modifications, the selection of the optimal set from the entire range  
74 of chromatin modifications for enhancer identification become an urgent question for  
75 biologists. So in the work of Rajagopals et al., they developed RFECS, a Random-Forest  
76 based algorithm to integrate 24 histone modification profiles in all for identification of  
77 enhancers in several cell types [13]. They claimed that their method not only led to more  
78 accurate predictions but also identified the most informative and robust set of three chromatin  
79 marks for enhancer identification. However, the goals of all the aforementioned methods  
80 were simply to label a DNA sequence as an enhancer or not. They neglected to determine the  
81 strength of enhancers, i.e., their activity level, which is also biologically meaningful. Given  
82 that, Liu et al. proposed a two-layer predictor called iEnhancer-2L by formulating DNA  
83 elements with pseudo  $k$ -tuple nucleotide composition [14]. In the second layer of their  
84 predictor, they identified the strength of enhancers for the very first time. Considering the  
85 poor performance of iEnhancer-2L, they further improved their algorithm by formulating  
86 sequences with different feature representations and using ensemble learning in their later  
87 work iEnhancer-EL [15]. On the basis of Liu et al.'s work, Jia et al. developed a predictor  
88 called EnhancerPred by extracting three types of sequence-based features and using support  
89 vector machine to identify enhancers and their strength [16]. Recently, Cai et al. proposed a  
90 more advanced predictor named iEnhancer-XG. In their method, as many as five different  
91 sequence derived feature representations were used as the input of XG-boost, a new learning  
92 algorithm based on gradient boosted decision trees [17].

93 Over the past few years, deep learning has seen a comprehensive penetration into various  
94 fields, including computer vision, natural language processing and even bioinformatics  
95 [18-23]. Naturally, a torrent of deep learning based methods for enhancer identification have  
96 sprung up, such as EP-DNN, BiRen, DECRES, DeepEnhancer and so on [24-27]. Comparing  
97 to traditional machine learning methods, deep learning obviates the need for manually  
98 curating features and can unearth informative hidden patterns in the data. While these deep  
99 learning based enhancer predictors give much better performance than that of traditional  
100 machine learning based ones, their weaknesses are also quite obvious, i.e., the prediction of  
101 enhancer strength is not reflected in their methodologies.

102 We here present a two-layer enhancer predictor named DENIES by utilizing DNA shape  
103 information besides two common sequence-derived features (i.e. one-hot encoding and  $k$ -mer)  
104 as the input of our developed deep learning model. DNA shape refers to the  
105 three-dimensional structures of DNA. While several studies have pointed out its extremely  
106 importance in biology, the appliance of this particular feature has been limited to the  
107 modeling of TF-DNA binding [28-29]. In the study of iEnhancer-2L, Liu et al. incorporated  
108 six DNA local structural parameters into their formulated pseudo  $k$ -tuple nucleotide  
109 composition [14]. But these local structural parameters are just predicted from the  
110 physicochemical properties of two neighboring base pairs and unable to accurately reflect the  
111 three-dimensional structure of DNA sequences. Given this, we use DNashape [30], a Monte

112 Carlo (MC) simulation based method, to derive more accurate DNA shape features in our  
113 study. Comparing to existing state-of-the-art methods, the performance of our proposed  
114 predictor gets an obvious boost for both layers of enhancer identification. More importantly,  
115 it proves that DNA shape can be used as another major feature to enhance the identification  
116 of enhancers and their strength.

117

## 118 **2. Materials and Methods**

### 119 **2.1. Benchmark and independent datasets**

120 The benchmark and independent datasets used in our study were obtained from a series of  
121 previous works [14-17]. The construction of the two datasets was based on the chromatin  
122 state annotation. Specifically, Ernst et al. mapped nine chromatin marks across nine cell types  
123 and used recurrent combinations of these marks to define 15 chromatin states including  
124 repressed, poised and active promoters, strong and weak enhancers and so on. Then  
125 ChromHMM was developed using a multivariate Hidden Markov Model to learn these  
126 chromatin states information and got the genome-wide chromatin state annotation in these  
127 different cell lines [31-32]. After that, different sorts of DNA sequences were selected as  
128 candidate samples to construct the two datasets based on the genome-wide chromatin state  
129 annotation given by ChromHMM in a total of nine cell types.

130 A detailed description of the post processing on these candidate samples can be looked  
131 up in the original works of Liu et al [14-15]. Here, we just report the composition of the final  
132 datasets. The benchmark dataset consists of 2968 sequence samples, each of which is 200 bp  
133 long. Among these, 1484 samples are enhancers and the other 1484 samples are  
134 non-enhancers. They are used to construct the first layer predictor. Of the 1484 enhancer  
135 samples, strong enhancers and weak enhancers are half and half. They are used to construct  
136 the second layer predictor. The independent dataset was constructed based on the same  
137 protocol as used to construct the benchmark dataset. It's composed of 200 enhancers and 200  
138 non-enhancers. Of the 200 enhancers, one half are strong enhancers, and the other half are  
139 weak enhancers. These samples of the independent dataset are used to evaluate the  
140 performance of predictors developed using the benchmark dataset. Note that there's no  
141 overlap between the samples in benchmark dataset and independent dataset [15].

142

### 143 **2.2. Feature representation**

144 A fundamental problem in developing a bioinformatics related predictor is how to formulate a  
145 biological sequence (i.e. DNA sequence in our study) with some specific feature  
146 representations. While an effective feature representation is able to extract the most  
147 informative patterns in a sequence, an unsatisfactory one can hardly ensure the integrality of  
148 the information. In truth, quite a lot of feature representations for biological sequences have

149 been proposed so far, such as  $k$ -mer, pseudo  $k$ -tuple nucleotide composition (PseKNC),  
150 subsequence and mismatch profile [33]. In this study, we explore three feature representation  
151 methods, namely, one-hot,  $k$ -mer and DNA shape. Among these, one-hot and  $k$ -mer represent  
152 two common ways to formulate DNA sequences. They have been widely used in  
153 bioinformatics to resolve various types of classification and prediction problems. However,  
154 sequence-constraint methods often fail to identify non-coding functional elements like  
155 enhancers because they neglect to consider the three-dimensional structures of DNA  
156 sequences [34]. Hence, DNA shape is used as another feature representation method in our  
157 study for describing the 3D structures of DNA sequences. A detailed description of these  
158 three different feature representation methods is as below.

159

### 160 **2.2.1. K-mer**

161 Oligomers of length  $k$ , or  $k$ -mer refers to all the subsequences of length  $k$  contained within a  
162 biological sequence. It's a widely used and probably the simplest feature representation  
163 method for modeling the properties and functions of biological sequences [33]. In the case of  
164 deoxyribonucleic acid, every sequence is composed of four different types of nucleotides (i.e.  
165 A, C, G and T).  $K$ -mer approach will first list all the possible subsequences of length  $k$  and  
166 scan the whole DNA sequence to find the occurrence frequency of each subsequence. Then  
167 the occurrence frequency of each subsequence will be combined by the order of the listed  
168 subsequences. This combined feature vector is called the  $k$ -mer feature vector of that  
169 sequence. Suppose we have a sequence  $S$ , then the  $k$ -mer feature vector of  $S$  can be defined  
170 as:

$$171 \quad f^S = [y_1^S, y_2^S, \dots, y_i^S, \dots, y_L^S] \quad (1)$$

172 where  $y_i^S$  is the occurrence frequency of the  $i$ th  $k$  neighboring nucleotides in the sequence  $S$   
173 and the value of  $L$  is  $4^k$ . As pointed in [35], the selection of the parameter  $k$  in  $k$ -mer feature  
174 representation is of great difficulty owing to its inherent limitation. The  $k$ -mer feature vector  
175 tends to get sparser and encode less efficient information when  $k$  gradually increases. We  
176 observed that the  $k$ -mer vector is quite sparse when the value of  $k$  is higher than 5 in our case  
177 since the length of enhancer sequences in our dataset is comparatively short. Here, we use a  
178 combination of different  $k$ -mer feature vectors where  $k$  ranges from 1 to 5. Then these vectors  
179 are concatenated to a final feature vector.

180

### 181 **2.2.2. One-hot encoding**

182 One-hot encoding is another common feature representation method for formulating DNA  
183 sequences. With deep learning gradually penetrated into bioinformatics, this encoding  
184 scheme is very popular when it's combined in use with convolutional neural networks (CNN)  
185 [20-25]. With this feature representation, every nucleotide in the sequence will be

186 transformed into a four-dimensional binary vector with the bit marking the current nucleotide  
187 set to one and all the other bits set to zero. Specifically, the four nucleotides, A (adenine), C  
188 (cytosine), G (guanine), T (thymine) will be transformed into binary vectors  $(1, 0, 0, 0)^T$ ,  $(0,$   
189  $1, 0, 0)^T$ ,  $(0, 0, 1, 0)^T$ ,  $(0, 0, 0, 1)^T$  respectively. Then the binary vector for each nucleotide in  
190 the DNA sequences will be merged into a binary matrix. Given a DNA sequence  $\mathbf{S} = N_1 N_2 \cdots$   
191  $N_i \cdots N_L$ , then the one-hot encoding matrix  $\mathbf{M}$  for sequence  $\mathbf{S}$  can be formulated as:

$$192 \quad \mathbf{M} = [f(N_1) f(N_2) \cdots f(N_i) \cdots f(N_L)] \quad (2)$$

193 where  $f$  is a function defined as:

$$194 \quad f(N_i) = \begin{cases} (1,0,0,0)^T; & \text{if } N_i = A \\ (0,1,0,0)^T; & \text{if } N_i = C \\ (0,0,1,0)^T; & \text{if } N_i = G \\ (0,0,0,1)^T; & \text{if } N_i = T \end{cases} \quad (3)$$

### 195 **2.2.3. DNA shape**

196 DNA shape presents the chromatin structural information about DNA sequences with which  
197 the other two classic feature representation methods can not provide. As distal cis-regulatory  
198 elements that can activate downstream genes, the chromatin structures of enhancer regions  
199 tend to be open so as to provide a protein-binding platform for a combination of transcription  
200 factors and co-factors. In fact, several former studies have pointed out the role of DNA shape  
201 in the recognition of three-dimensional DNA structures for transcription factors [36-38].  
202 Before long Zhou et al. proposed a high-throughput method called DNashape for predicting  
203 chromatin structural features from DNA sequences [28]. The core of their methodology is a  
204 pentamer based model built from all-atom Monte Carlo simulations where a sliding-window  
205 approach is used to mine DNA shape features from DNA sequences. Later, Chiu et al.  
206 developed DNashapeR, an R/Bioconductor package on the basis of DNashape to generate  
207 DNA shape predictions in an ultra-fast, high-throughput and user-friendly manner [39]. At  
208 first, only four DNA shape features were included, that is minor groove width (MGW), helix  
209 twist (HelT), propeller twist (ProT) and Roll, for their extremely importance in the  
210 recognition of DNA structures. And in their latest package release, another 9 DNA shape  
211 features were added and the entire repertoire was finally expanded to a total of 13. Among  
212 these, seven features were nucleotide shape parameters and the other six were base pair-step  
213 parameters. A simple sketch on explaining the distinction between generating the two types  
214 of DNA shape parameters is presented in Fig. 1 where the DNA sequence is scanned with a  
215 pentamer sliding window. For each pentamer subsequence currently being scanned, a DNA  
216 shape prediction value of the central nucleotide or two prediction values of the two central  
217 base pair steps will be computed based on the specific type of the given DNA shape

218 parameter. Supposing the length of a DNA sequence is  $N$ , then the dimension of nucleotide  
219 shape parameter-based feature vector and base pair-step shape parameter-based feature vector  
220 can be easily induced as  $N - 4$  and  $N - 3$  respectively. As there are 7 nucleotide shape  
221 parameters and 6 base pair-step shape parameters used in our study, the length of the  
222 concatenated shape feature vector can be formulated as  $7 \times (N - 4) + 6 \times (N - 3)$ . Given  $N =$   
223 200 in our case, an input DNA sequence can be finally encoded with a DNA shape vector of  
224 dimension 2554.

225

### 226 **2.3 Network architecture**

227 The detailed network architecture of our designed deep learning model is depicted in Fig. 2.  
228 The model is mainly composed of four modules that are already filled with a light blue  
229 background. The top three modules, from left, are DNA shape module, one-hot module and  
230  $k$ -mer module respectively. A detailed description of each module is as follows. In DNA  
231 shape module, the R package DNASHapeR is used to generate the shape feature predictions  
232 from the given set of DNA shape parameters as the protocol illustrated in Fig. 1. In our study,  
233 all the 13 DNA shape features were generated for our enhancer dataset. In one-hot encoding  
234 module, the input sequence is firstly encoded with a  $4 \times 200$  one-hot binary matrix and then  
235 fed into a two-layer convolution neural network. Sixteen convolutional kernels with  
236 dimension  $4 \times 8$  and thirty-two convolutional kernels with dimension  $1 \times 8$  are used for the  
237 first and second convolutional layer respectively. Notably, while it hasn't been shown in the  
238 figure for simplicity, each convolutional layer is followed by a max pooling layer with  
239 dimension  $1 \times 2$ . After convolutions, the output feature maps will be flattened to a feature  
240 vector. And in kmer module, the frequency vector of different  $k$ -mers ( $k$  ranges from 1 to 5)  
241 will be computed separately and then concatenated. Finally, output vectors of the top three  
242 modules are concatenated and sent into the joint module where a multilayer perceptron  
243 network (MLP) with two hidden layers is used. The number of neurons used for the first and  
244 second layers are 512 and 64 respectively. The output layer has only one neuron representing  
245 the binary classification result of our network.

246

### 247 **2.4. Configuration and implementation**

248 All the models built in our study are implemented with Pytorch 1.4.0 [40]. Adam [41] is  
249 chosen as our optimizer algorithm and the learning rate for training models is set to  $1e-5$ . The  
250 mini-batch size is 20 and binary cross entropy is employed as the loss function. To prevent  
251 models from overfitting, the early stopping strategy is used with patience set to 30 and the  
252 evaluation metric MCC is monitored in validation set. That is to say, after a successive of 30  
253 training epochs with no increase on the metric MCC, the training process is stopped and the  
254 model at the epoch with the highest MCC value will be saved for evaluation on the  
255 independent dataset.

256

## 257 2.5. Performance evaluation

258 For a fair comparison, the identical set of evaluation metrics as used in a series of previous  
259 works is also adopted in our study. These metrics are sensitivity (SN), specificity (SP),  
260 accuracy (ACC), and Matthew correlation coefficient (MCC). They are all formulated as  
261 below:

$$262 \left\{ \begin{array}{l} SN = \frac{TP}{TP + FN} \\ SP = \frac{TN}{TN + FP} \\ ACC = \frac{TP + TN}{TP + TN + FP + FN} \\ MCC = \frac{TP \times TN - FP \times FN}{\sqrt{(TP + FP)(TP + FN)(TN + FP)(TN + FN)}} \end{array} \right. \quad (4)$$

263 where TP, TN, FP, FN represent the number of true positives, true negatives, false positives  
264 and false negatives respectively. Considering our dataset is comparatively small, a five-fold  
265 cross validation is used to evaluate the performance of our model. Specifically, our  
266 benchmark dataset is partitioned into five folds. Every time four parts of them will be used as  
267 the training set and the remaining one will be used as the validation set. This process is  
268 repeated after 5 times and each time we will get a different data partition for the training of  
269 our model. Then the five trained models will be tested in turn on the independent dataset. As  
270 there are a total of five predicts given by the respective trained models, we further adopt an  
271 ensemble learning strategy to get the final predict on the independent dataset (i.e. taking the  
272 mean value of the five predicts). To reflect the stability of our models, the five-fold cross  
273 validation experiment is conducted for ten times in all and the results are shown with box  
274 plots.

275

## 276 3. Results

### 277 3.1. Performance comparison between the basic set and full set of DNA shape 278 features

279 DNashape initially provided the prediction of only 4 DNA shape features, namely MGW,  
280 ProT, Roll and HelT, which we refer to as the basic set. Another 9 features (Rise, Roll, Shift,  
281 Slide, Tilt, Buckle, Opening, Shear, Stagger and Stretch) were added in the latest version of  
282 DNashapeR and the feature set was expanded to a total of 13, which we refer to as the full  
283 set. While former studies focused mainly on the basic set, the full set of DNA shape features  
284 were used in our study. Naturally, it's worth evaluating whether these 9 new added DNA  
285 shape features have a positive effect on the identification of enhancers and their strength. To  
286 prove that, we compared the performance of basic set and full set of DNA shape features on  
287 the independent dataset. The results of the performance evaluation on five metrics have been



288 shown in Fig. 2. For the first layer targeting at distinguishing enhancers from non-enhancers,  
289 the performance of full set is better than that of basic set by a narrow margin on four  
290 evaluation metrics except for sensitivity (SN). While for the second layer aiming at  
291 distinguishing strong enhancers from weak enhancers, the edge of full set comparing to basic  
292 set is more obvious with a lead of performance on all five evaluation metrics. Obviously, the  
293 introduction of the additional 9 DNA shape features has a positive influence for both layers of  
294 enhancer prediction, especially for the second layer.

295

### 296 **3.2. Visualization of DNA shape features**

297 Besides the prediction of DNA shape features, another outstanding function provided by  
298 DNASHapeR is its graphical representation, which means various shape features predicted  
299 from DNA sequences can be visualized for further analysis. Here, we use the function  
300 plotShape given in the software package to visualize DNA shape features as aggregated line  
301 plots (i.e., the shape feature values of all the sequence samples are aggregated in column  
302 direction to get the mean value). The shape features of positive set and negative set are both  
303 shown in a single picture to reflect the difference. The line plots of some representative shape  
304 features have been chosen and shown in Fig. 4 and Fig. 5. For minor groove width, the two  
305 aggregated lines are separated on the first layer while overlapped on the second layer, which  
306 suggests that MGW is an efficient shape feature to distinguish enhancers from non-enhancers  
307 but may not be ideal for distinguishing strong enhancers from weak enhancers. For the DNA  
308 shape feature Opening, the two aggregated lines are obviously separated on both layers  
309 suggesting its effectiveness for both layers of enhancer identification. For Buckle, though the  
310 aggregated line of positive set is higher than that of negative set, there's still some overlap  
311 between them. And for Tilt, the profiles of both lines just fluctuate around zero, which may  
312 suggest this shape feature can hardly be used for enhancer identification task.

313

### 314 **3.3. Performance of different feature representations and their combinations**

315 As there are total three different types of feature representations used in our method, a natural  
316 question in face of us is to determine the importance of them in the identification of  
317 enhancers. For that, each module used in Fig. 2 is taken out and designed as an individual  
318 network. Besides, different modules are combined to see the effect of various combinations  
319 of these feature representations. For the sake of simplicity, the model combining one-hot and  
320 DNA shape modules is denoted as 'O-S'; the model combining one-hot and k-mer modules is  
321 denoted as 'O-K'; the model combining DNA shape and k-mer modules is denoted as 'S-K';  
322 the model combining all three modules is denoted simply as 'ALL'. Then the performance of  
323 all these models is evaluated with a five-fold cross validation on the independent dataset. To  
324 reflect the stability of these models, the cross validation experiment is repeated after 10 times.  
325 The results of the ten experiments have been shown with box plot in Fig. 6 and the mean  
326 values of the five evaluation metrics are given in Table 1 and Table 2. For the first layer, kmer

327 approach achieves the best performance among the three single feature representations with  
328 ACC at 75.8% and MCC at 0.516. The performance of the other two feature representations,  
329 namely one-hot and shape, are very close with accuracy over 73.5% and MCC around 0.47.  
330 While for the second layer prediction, the performance of one-hot feature is much  
331 unsatisfactory with ACC at 57.95% and MCC at 0.163. For the other two feature  
332 representations, the performance of DNA shape is slightly lower than that of kmer. Their  
333 ACC and MCC are over 62% and 0.24 respectively. Overall, kmer outperforms the other two  
334 feature representations on both layers. The performance of DNA shape comes next and  
335 one-hot performs worst among the three feature representations. As for those combined  
336 feature representations, their performance basically all improved compared to that of single  
337 feature representations. Notably, the model combining all three feature representations  
338 performed best on both layers. For the first layer, it achieves the best performance on all  
339 evaluation metrics except for sensitivity (SN). And for the second layer, it outperforms the  
340 other models on all evaluation metrics except for specificity (SP). For that reason, it's  
341 selected as our final model for performance comparison with a series of state-of-the-art  
342 methods.

343

### 344 **3.4. Performance comparison with existing methods**

345 We compare the performance of our final model on the independent dataset with some  
346 existing state-of-the-art works. The result of comparison has been listed in Table 3. It can be  
347 seen from the table that our method achieves the highest performance on most evaluation  
348 metrics for both layers. Note that ACC and MCC are deemed as the two most important ones  
349 among the five evaluation metrics for our prediction task [15]. For the first layer, ACC is  
350 improved by over one percentage point and MCC is improved by 0.024. And for the second  
351 layer, these two metrics are boosted by 4.75% and 0.108. As another important evaluation  
352 metric for binary classification, AUC is improved from 0.817 to 0.834 and from 0.680 to  
353 0.753 for the first and second layer respectively. On the whole, the performance of our  
354 method surpasses these existing methods terms of a comprehensive comparison on these  
355 evaluation metrics.

356

## 357 **4. Discussion and conclusion**

358 As the core parts of DNA regulatory elements responsible for regulating gene expression,  
359 enhancers have always been paid the most attention in bioinformatics. However, their  
360 locational uncertainty and the poor understanding of their sequence code have made their  
361 identification an extremely challenging task [2]. To further enhance the identification of  
362 enhancers and their strength, most of the current machine learning based predictors tend to  
363 derive more feature representations from DNA sequences and ensemble the prediction results  
364 of individual features. While some of the existing structural biology and genomics studies

365 have confirmed the relationship between TF-DNA binding and the recognition of chromatin  
366 structures, we observe that the sequence-derived feature representations used in previous  
367 works cannot reflect the structural information of DNA sequences. In light of this, DNA  
368 shape is used as an additional feature input besides two commonly used ones, i.e., one-hot  
369 encoding and kmer for our developed deep learning model. Through the ablation experiment,  
370 we find that the performance of feature combined models is boosted comparing to those  
371 single feature representation based ones. Above all, the deep learning model with all the three  
372 feature representations as input achieves best performance on both layers of enhancer  
373 identification. And in the comparison with some state-of-the-art methods, DENIES achieves  
374 remarkable performance with only three features all derived from DNA sequences.

375 Yet, our study can be further improved from two main aspects. One is to increase the  
376 interpretability of our method. An inherent and obvious drawback of deep learning based  
377 method is its poor interpretability since it operates like a black box. In our method, we throw  
378 ten more DNA shape features into the deep learning model for training, but the importance  
379 degree of each feature in the identification of enhancers is unclear for us. Though we  
380 visualize different DNA shape features as aggregated line plots, there still needs a method to  
381 quantitatively determine the importance degrees of them. In the work of RFECS [13], they  
382 developed a new type of random forest algorithm named vector-random forest by utilizing  
383 linear discriminant at each node. The most significant feature of this random forest is that the  
384 nodes of decision trees can be vectors. By utilizing this new type of random forest algorithm,  
385 each DNA shape feature will be given a score representing its importance degree in  
386 identifying enhancers. We can further rank these DNA shape features by the importance  
387 scores to derive an optimal set of DNA shape features for identifying enhancers. Another  
388 aspect is to integrate epigenetic features like histone modifications. Many studies have  
389 associated the enhancer activities with certain characteristic histone modification patterns [5,  
390 13, 42]. However, histone marks are cell line specific while the enhancer dataset used in our  
391 study are not, so it's beyond our reach at present. Nevertheless, it doesn't affect us to apply  
392 this method in later constructed cell line specific enhancer dataset.

393

## 394 **References**

- 395 1. Maston, G. A., Evans, S. K., & Green, M. R. (2006). Transcriptional regulatory elements  
396 in the human genome. *Annual review of genomics and human genetics*, 7, 29–59.
- 397 2. Pennacchio, L. A., Bickmore, W., Dean, A., Nobrega, M. A., & Bejerano, G. (2013).  
398 Enhancers: five essential questions. *Nature reviews. Genetics*, 14(4), 288–295.
- 399 3. Mardis E. R. (2007). ChIP-seq: welcome to the new frontier. *Nature methods*, 4(8), 613–  
400 614.
- 401 4. Visel, A., Blow, M. J., Li, Z., Zhang, T., Akiyama, J. A., Holt, A., Plajzer-Frick, I.,  
402 Shoukry, M., Wright, C., Chen, F., Afzal, V., Ren, B., Rubin, E. M., & Pennacchio, L. A.

- 403 (2009). ChIP-seq accurately predicts tissue-specific activity of enhancers. *Nature*,  
404 457(7231), 854–858.
- 405 5. Heintzman ND, Stuart RK, Hon G, Fu Y, Ching CW, Hawkins RD, Barrera LO, Van  
406 Calcar S, Qu C, Ching KA, Wang W, Weng Z, Green RD, Crawford GE, Ren B. Distinct  
407 and predictive chromatin signatures of transcriptional promoters and enhancers in the  
408 human genome. *Nat Genet.* 2007 Mar;39(3):311-8.
- 409 6. Creyghton, M. P., Cheng, A. W., Welstead, G. G., Kooistra, T., Carey, B. W., Steine, E. J.,  
410 Hanna, J., Lodato, M. A., Frampton, G. M., Sharp, P. A., Boyer, L. A., Young, R. A., &  
411 Jaenisch, R. (2010). Histone H3K27ac separates active from poised enhancers and  
412 predicts developmental state. *Proceedings of the National Academy of Sciences of the*  
413 *United States of America*, 107(50), 21931–21936.
- 414 7. Dorschner, M. O., Hawrylycz, M., Humbert, R., Wallace, J. C., Shafer, A., Kawamoto, J.,  
415 Mack, J., Hall, R., Goldy, J., Sabo, P. J., Kohli, A., Li, Q., McArthur, M., &  
416 Stamatoyannopoulos, J. A. (2004). High-throughput localization of functional elements  
417 by quantitative chromatin profiling. *Nature methods*, 1(3), 219–225.
- 418 8. Buenrostro, J. D., Wu, B., Chang, H. Y., & Greenleaf, W. J. (2015). ATAC-seq: A Method  
419 for Assaying Chromatin Accessibility Genome-Wide. *Current protocols in molecular*  
420 *biology*, 109, 21.29.1–21.29.9.
- 421 9. Kim, T. K., Hemberg, M., Gray, J. M., Costa, A. M., Bear, D. M., Wu, J., Harmin, D. A.,  
422 Laptewicz, M., Barbara-Haley, K., Kuersten, S., Markenscoff-Papadimitriou, E., Kuhl, D.,  
423 Bitto, H., Worley, P. F., Kreiman, G., & Greenberg, M. E. (2010). Widespread  
424 transcription at neuronal activity-regulated enhancers. *Nature*, 465(7295), 182–187.
- 425 10. Core, L. J., Waterfall, J. J., & Lis, J. T. (2008). Nascent RNA sequencing reveals  
426 widespread pausing and divergent initiation at human promoters. *Science (New York,*  
427 *N.Y.)*, 322(5909), 1845–1848.
- 428 11. Kodzius, R., Kojima, M., Nishiyori, H., Nakamura, M., Fukuda, S., Tagami, M., Sasaki,  
429 D., Imamura, K., Kai, C., Harbers, M., Hayashizaki, Y., & Carninci, P. (2006). CAGE:  
430 cap analysis of gene expression. *Nature methods*, 3(3), 211–222.
- 431 12. Firpi, H. A., Ucar, D., & Tan, K. (2010). Discover regulatory DNA elements using  
432 chromatin signatures and artificial neural network. *Bioinformatics (Oxford, England)*,  
433 26(13), 1579–1586.
- 434 13. Rajagopal, N., Xie, W., Li, Y., Wagner, U., Wang, W., Stamatoyannopoulos, J., Ernst, J.,  
435 Kellis, M., & Ren, B. (2013). RFECS: a random-forest based algorithm for enhancer  
436 identification from chromatin state. *PLoS computational biology*, 9(3), e1002968.
- 437 14. Liu, B., Fang, L., Long, R., Lan, X., & Chou, K. C. (2016). iEnhancer-2L: a two-layer  
438 predictor for identifying enhancers and their strength by pseudo k-tuple nucleotide  
439 composition. *Bioinformatics (Oxford, England)*, 32(3), 362–369.
- 440 15. Liu, B., Li, K., Huang, D. S., & Chou, K. C. (2018). iEnhancer-EL: identifying enhancers  
441 and their strength with ensemble learning approach. *Bioinformatics (Oxford, England)*,

- 442 34(22), 3835–3842.
- 443 16. Jia, C., & He, W. (2016). EnhancerPred: a predictor for discovering enhancers based on  
444 the combination and selection of multiple features. *Scientific reports*, 6, 38741.
- 445 17. Cai, L., Ren, X., Fu, X., Peng, L., Gao, M., & Zeng, X. (2020). iEnhancer-XG:  
446 Interpretable sequence-based enhancers and their strength predictor. *Bioinformatics*  
447 (Oxford, England), btaa914. Advance online publication.
- 448 18. He, K., Zhang, X., Ren, S., & Sun, J. (2016). Deep residual learning for image  
449 recognition. In *Proceedings of the IEEE conference on computer vision and pattern*  
450 *recognition* (pp. 770-778).
- 451 19. Collobert, R., & Weston, J. (2008, July). A unified architecture for natural language  
452 processing: Deep neural networks with multitask learning. In *Proceedings of the 25th*  
453 *international conference on Machine learning* (pp. 160-167).
- 454 20. Zhou, J., & Troyanskaya, O. G. (2015). Predicting effects of noncoding variants with  
455 deep learning-based sequence model. *Nature methods*, 12(10), 931–934.
- 456 21. Alipanahi, B., DeLong, A., Weirauch, M. T., & Frey, B. J. (2015). Predicting the sequence  
457 specificities of DNA- and RNA-binding proteins by deep learning. *Nature biotechnology*,  
458 33(8), 831–838.
- 459 22. Quang, D., & Xie, X. (2016). DanQ: a hybrid convolutional and recurrent deep neural  
460 network for quantifying the function of DNA sequences. *Nucleic acids research*, 44(11),  
461 e107.
- 462 23. Kelley, D. R., Snoek, J., & Rinn, J. L. (2016). Basset: learning the regulatory code of the  
463 accessible genome with deep convolutional neural networks. *Genome research*, 26(7),  
464 990–999.
- 465 24. Yang, B., Liu, F., Ren, C., Ouyang, Z., Xie, Z., Bo, X., & Shu, W. (2017). BiRen:  
466 predicting enhancers with a deep-learning-based model using the DNA sequence alone.  
467 *Bioinformatics* (Oxford, England), 33(13), 1930–1936.
- 468 25. Min, X., Zeng, W., Chen, S., Chen, N., Chen, T., & Jiang, R. (2017). Predicting enhancers  
469 with deep convolutional neural networks. *BMC bioinformatics*, 18(Suppl 13), 478.
- 470 26. Li, Y., Shi, W., & Wasserman, W. W. (2018). Genome-wide prediction of cis-regulatory  
471 regions using supervised deep learning methods. *BMC bioinformatics*, 19(1), 202.
- 472 27. Liu, F., Li, H., Ren, C., Bo, X., & Shu, W. (2016). PEDLA: predicting enhancers with a  
473 deep learning-based algorithmic framework. *Scientific reports*, 6, 28517.
- 474 28. Zhou, T., Shen, N., Yang, L., Abe, N., Horton, J., Mann, R. S., Bussemaker, H. J., Gordân,  
475 R., & Rohs, R. (2015). Quantitative modeling of transcription factor binding specificities  
476 using DNA shape. *Proceedings of the National Academy of Sciences of the United States*  
477 *of America*, 112(15), 4654–4659.
- 478 29. Zhang, Q., Shen, Z., & Huang, D. S. (2021). Predicting in-vitro Transcription Factor  
479 Binding Sites Using DNA Sequence + Shape. *IEEE/ACM transactions on computational*  
480 *biology and bioinformatics*, 18(2), 667–676.

- 481 30. Zhou, T., Yang, L., Lu, Y., Dror, I., Dantas Machado, A. C., Ghane, T., Di Felice, R., &  
482 Rohs, R. (2013). DNASHape: a method for the high-throughput prediction of DNA  
483 structural features on a genomic scale. *Nucleic acids research*, 41(Web Server issue),  
484 W56–W62.
- 485 31. Ernst, J., Kheradpour, P., Mikkelsen, T. S., Shores, N., Ward, L. D., Epstein, C. B.,  
486 Zhang, X., Wang, L., Issner, R., Coyne, M., Ku, M., Durham, T., Kellis, M., & Bernstein,  
487 B. E. (2011). Mapping and analysis of chromatin state dynamics in nine human cell types.  
488 *Nature*, 473(7345), 43–49.
- 489 32. Ernst, J., & Kellis, M. (2012). ChromHMM: automating chromatin-state discovery and  
490 characterization. *Nature methods*, 9(3), 215–216.
- 491 33. Liu B. (2019). BioSeq-Analysis: a platform for DNA, RNA and protein sequence analysis  
492 based on machine learning approaches. *Briefings in bioinformatics*, 20(4), 1280–1294.
- 493 34. Friedel, M., Nikolajewa, S., Sühnel, J., & Wilhelm, T. (2009). DiProGB: the dinucleotide  
494 properties genome browser. *Bioinformatics (Oxford, England)*, 25(19), 2603–2604.
- 495 35. Ghandi, M., Lee, D., Mohammad-Noori, M., & Beer, M. A. (2014). Enhanced regulatory  
496 sequence prediction using gapped k-mer features. *PLoS computational biology*, 10(7),  
497 e1003711.
- 498 36. Joshi, R., Passner, J. M., Rohs, R., Jain, R., Sosinsky, A., Crickmore, M. A., Jacob, V.,  
499 Aggarwal, A. K., Honig, B., & Mann, R. S. (2007). Functional specificity of a Hox  
500 protein mediated by the recognition of minor groove structure. *Cell*, 131(3), 530–543.
- 501 37. Rohs, R., West, S. M., Sosinsky, A., Liu, P., Mann, R. S., & Honig, B. (2009). The role of  
502 DNA shape in protein-DNA recognition. *Nature*, 461(7268), 1248–1253.
- 503 38. White, M. A., Myers, C. A., Corbo, J. C., & Cohen, B. A. (2013). Massively parallel in  
504 vivo enhancer assay reveals that highly local features determine the cis-regulatory  
505 function of ChIP-seq peaks. *Proceedings of the National Academy of Sciences of the*  
506 *United States of America*, 110(29), 11952–11957.
- 507 39. Chiu, T. P., Comoglio, F., Zhou, T., Yang, L., Paro, R., & Rohs, R. (2016). DNASHapeR:  
508 an R/Bioconductor package for DNA shape prediction and feature encoding.  
509 *Bioinformatics (Oxford, England)*, 32(8), 1211–1213.
- 510 40. Paszke, A., Gross, S., Massa, F., Lerer, A., Bradbury, J., Chanan, G., ... & Chintala, S.  
511 (2019). Pytorch: An imperative style, high-performance deep learning library. *arXiv*  
512 *preprint arXiv:1912.01703*.
- 513 41. Kingma, D. P., & Ba, J. (2014). Adam: A method for stochastic optimization. *arXiv*  
514 *preprint arXiv:1412.6980*.
- 515 42. Hon, G., Ren, B., & Wang, W. (2008). ChromaSig: a probabilistic approach to finding  
516 common chromatin signatures in the human genome. *PLoS computational biology*, 4(10),  
517 e1000201.
- 518

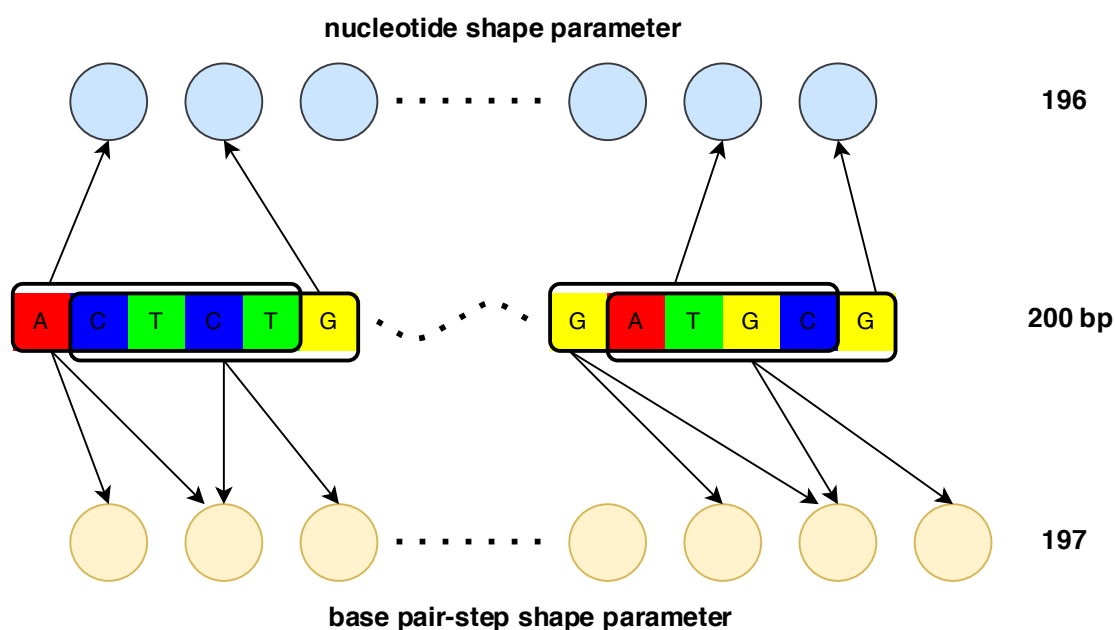

519

520 Figure 1. A simple sketch on illustrating the difference between the generation of nucleotide  
521 shape parameters and base pair-step shape parameters. The DNA sequence is scanned with a  
522 pentamer sliding window to derive DNA shape feature vectors. For each pentamer  
523 subsequence being scanned, a single prediction value of the central nucleotide will be  
524 computed for nucleotide parameters like MGW and ProT. While for base pair-step shape  
525 parameters like Roll and HelT, the prediction values of the two central base pair steps will be  
526 provided. Take the first pentamer in the sequence as an example, the central nucleotide is T  
527 and the two central base pair steps are CT and TC respectively. It's worth noting that the  
528 second central base pair step of a pentamer subsequence is identical to the first central base  
529 pair step of the next pentamer subsequence, so they share the same DNA shape prediction  
530 value.

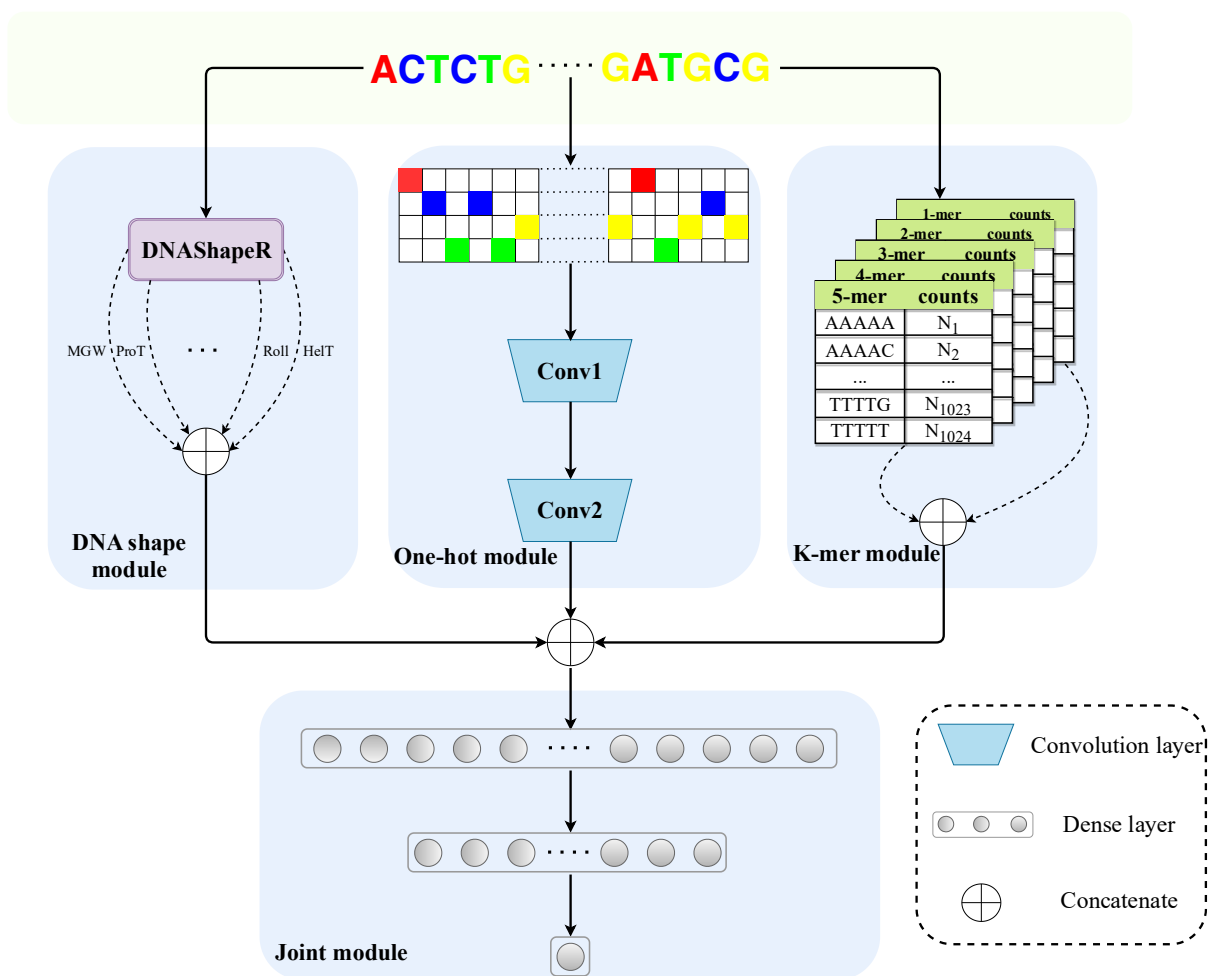

531

532 Figure 2. The network architecture of our designed deep learning model. The top three  
 533 modules, from left, are DNA shape module, one-hot module and kmer module respectively  
 534 and the bottom one is the joint module. The output vector from the top three modules will be  
 535 concatenated and fed into the joint module where a multilayer perceptron (MLP) is used to  
 536 get the final prediction result.

537

538



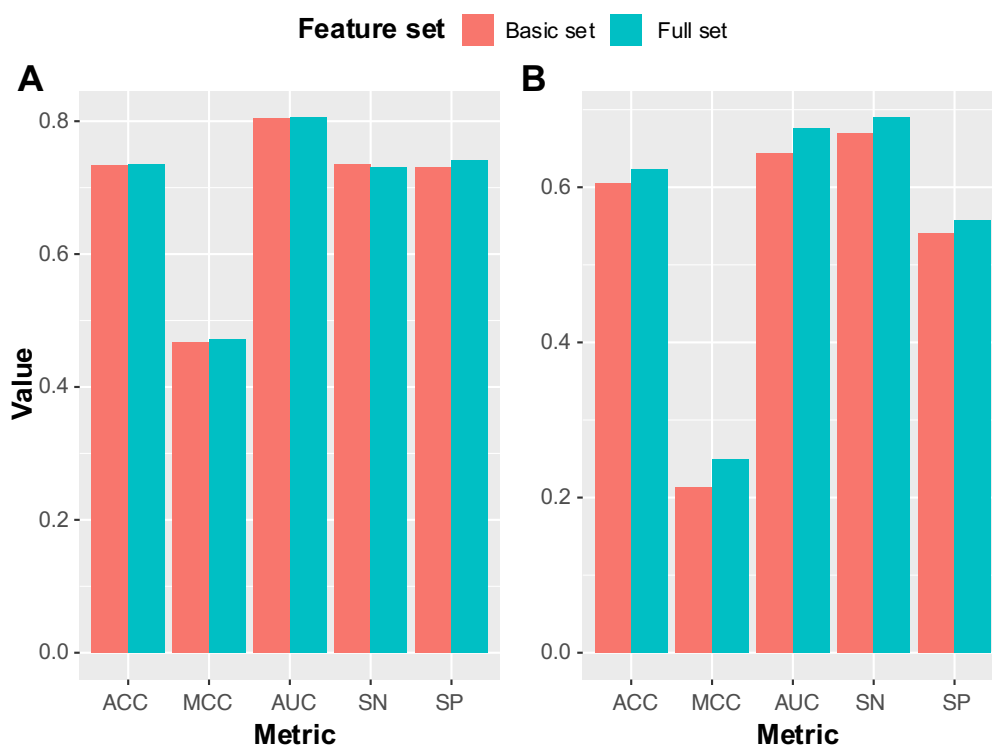

539

540 Figure 3. Performance comparison between the basic set and full set of DNA shape features on the (A) first  
541 layer and (B) second layer.

542

543

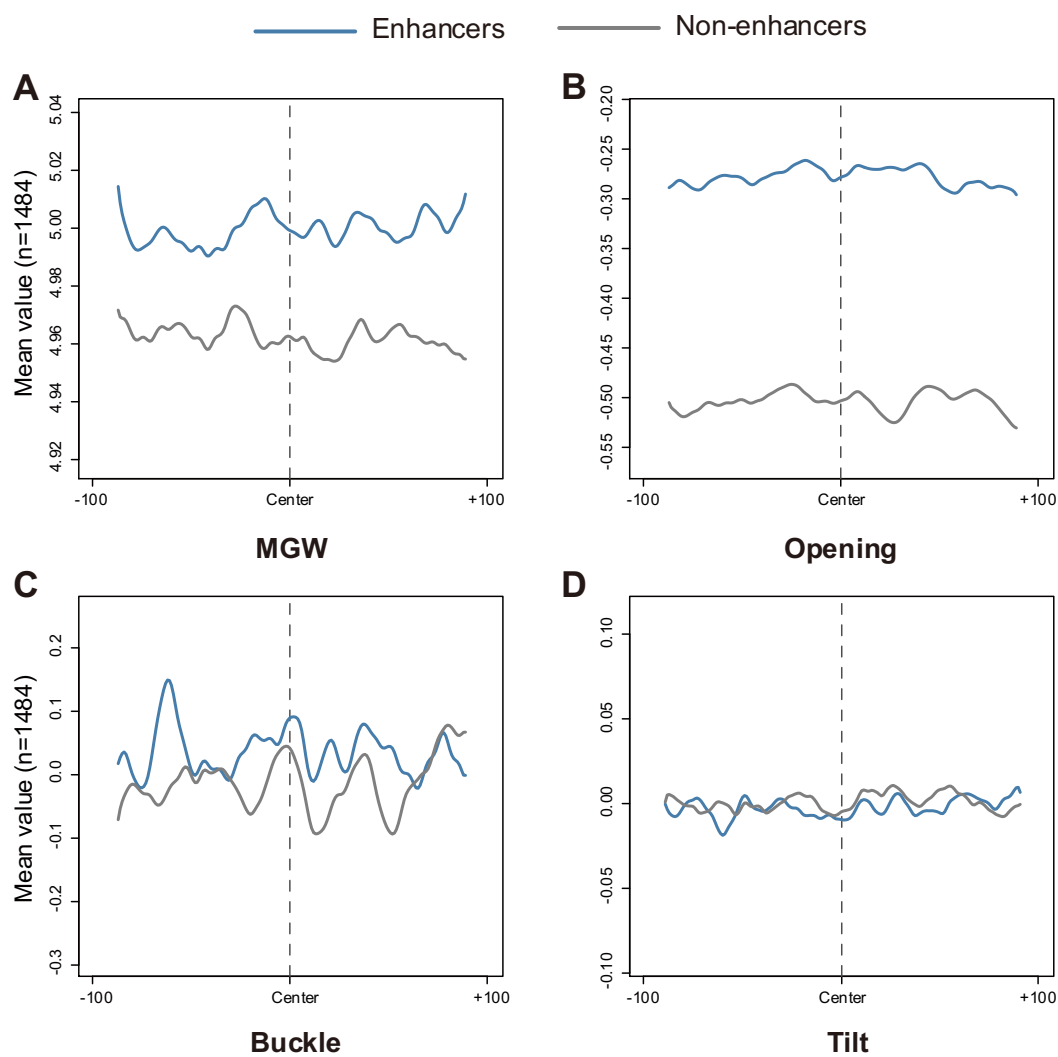

544

545 Figure 4. Visualization of four representative DNA shape feature features (A) MGW (B) Opening (C)

546 Buckle (D) Tilt with aggregated line plots on the first layer.

547

548

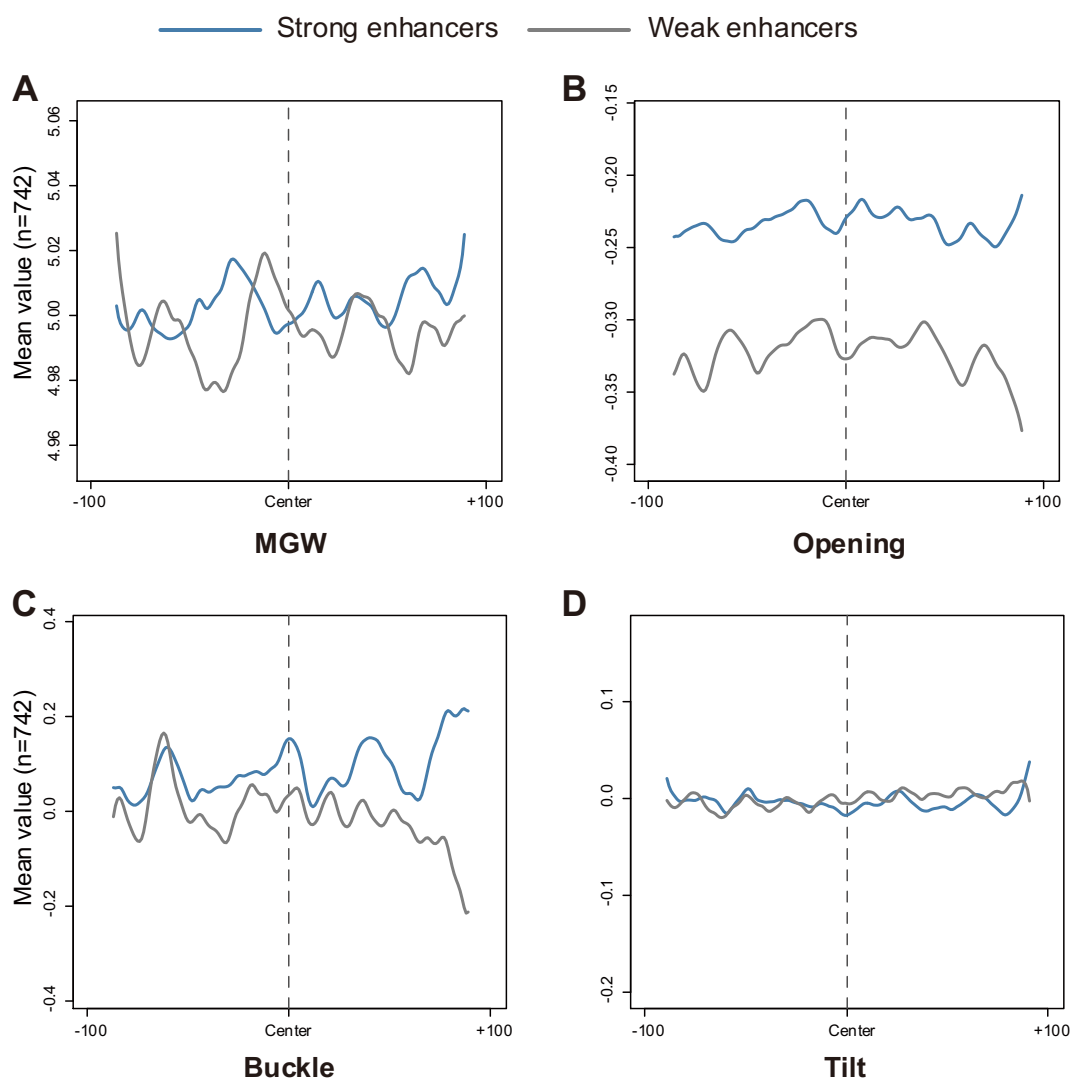

549

550 Figure 5. Visualization of four representative DNA shape feature features (A) MGW (B) Opening (C)

551 Buckle (D) Tilt with aggregated line plots on the second layer.

552

553

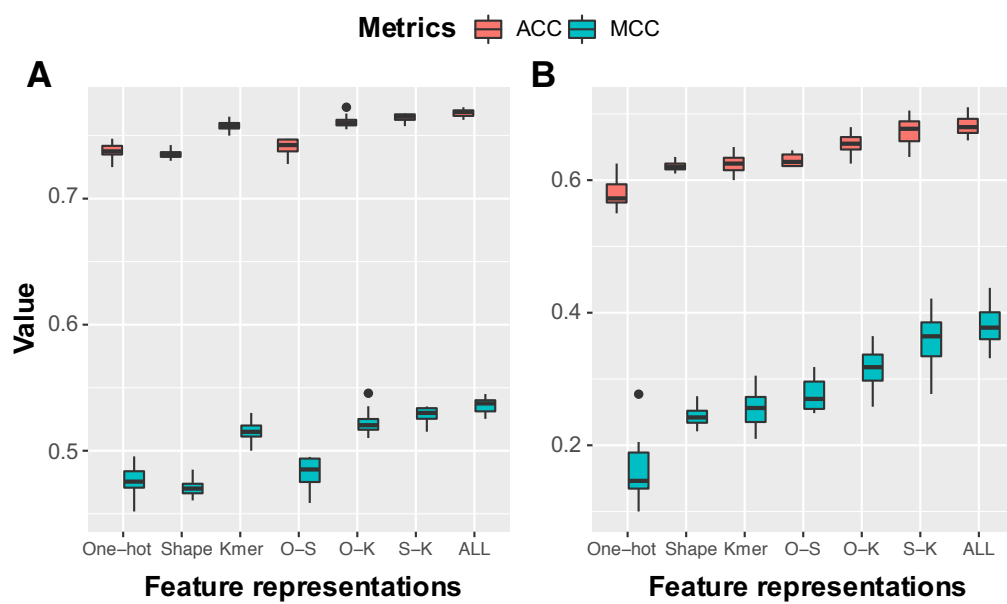

554

555 Figure 6. Performance of different feature representations and their combinations.

556

557

558 **Table 1** Performance of different feature representations and their combinations on the independent dataset  
559 of the first layer.

| Feature representations | ACC (%)      | MCC          | AUC          | SN (%)       | SP (%)       |
|-------------------------|--------------|--------------|--------------|--------------|--------------|
| One-hot                 | 73.70        | 0.475        | 0.812        | 71.20        | 76.20        |
| Shape                   | 73.55        | 0.471        | 0.806        | 74.00        | 73.10        |
| K-mer                   | 75.80        | 0.516        | 0.830        | 76.00        | 75.60        |
| O-S                     | 74.13        | 0.483        | 0.814        | 72.85        | 75.40        |
| O-K                     | 76.15        | 0.523        | 0.834        | 76.25        | 76.05        |
| S-K                     | 76.40        | 0.528        | 0.833        | <b>77.25</b> | 75.55        |
| All                     | <b>76.80</b> | <b>0.536</b> | <b>0.834</b> | 76.90        | <b>76.70</b> |

560 The highest value achieved on every single metric has already been marked in bold.

561

562

563 **Table 2** Performance of different feature representations and their combinations on the independent dataset  
564 of the second layer.

| Feature representations | ACC (%)      | MCC          | AUC          | SN (%)       | SP (%)       |
|-------------------------|--------------|--------------|--------------|--------------|--------------|
| One-hot                 | 57.95        | 0.163        | 0.638        | 66.40        | 49.50        |
| Shape                   | 62.05        | 0.243        | 0.679        | 68.40        | <b>55.70</b> |
| K-mer                   | 62.50        | 0.256        | 0.681        | 73.30        | 51.80        |
| O-S                     | 63.05        | 0.276        | 0.661        | 78.90        | 47.20        |
| O-K                     | 65.45        | 0.316        | 0.712        | 75.50        | 55.40        |
| S-K                     | 67.35        | 0.358        | 0.739        | 79.20        | 55.50        |
| All                     | <b>68.25</b> | <b>0.380</b> | <b>0.753</b> | <b>82.00</b> | 54.50        |

565 The highest value achieved on every single metric has already been marked in bold.

566

567

568

569

570

571

572

573

574

575

576

577

578 **Table 3** Performance comparison with existing methods on the independent dataset

| Task      | Method        | ACC (%)      | MCC          | AUC          | SN (%)       | SP (%)       |
|-----------|---------------|--------------|--------------|--------------|--------------|--------------|
| 1st layer | iEnhancer-2L  | 73.00        | 0.460        | 0.806        | 71.00        | 75.00        |
|           | Enhancer-Pred | 74.00        | 0.480        | 0.801        | 73.50        | 74.50        |
|           | iEnhancer-EL  | 74.75        | 0.496        | 0.817        | 71.00        | <b>78.50</b> |
|           | iEnhancer-XG  | 75.75        | 0.515        | -            | 74.00        | 77.50        |
|           | DENIES        | <b>76.80</b> | <b>0.536</b> | <b>0.834</b> | <b>76.90</b> | 76.70        |
| 2nd layer | iEnhancer-2L  | 60.50        | 0.218        | 0.668        | 47.00        | <b>74.00</b> |
|           | Enhancer-Pred | 55.00        | 0.102        | 0.579        | 45.00        | 65.00        |
|           | iEnhancer-EL  | 61.00        | 0.222        | 0.680        | 54.00        | 68.00        |
|           | iEnhancer-XG  | 63.50        | 0.272        | -            | 70.00        | 57.00        |
|           | DENIES        | <b>68.25</b> | <b>0.380</b> | <b>0.753</b> | <b>82.00</b> | 54.50        |

579 The highest value achieved on every single metric has already been marked in bold.
